# Supplementary material for: Morphology-controllable synthesis of 3D firecracker-like ZnO nanoarchitectures for high catalytic performance
Source: Royal Society of Chemistry journal article supplement (doi:10.1039/c4ce02151g), 2014-12-05
Supplement: c4ce02151g1.pdf [file c4ce02151g1.pdf]

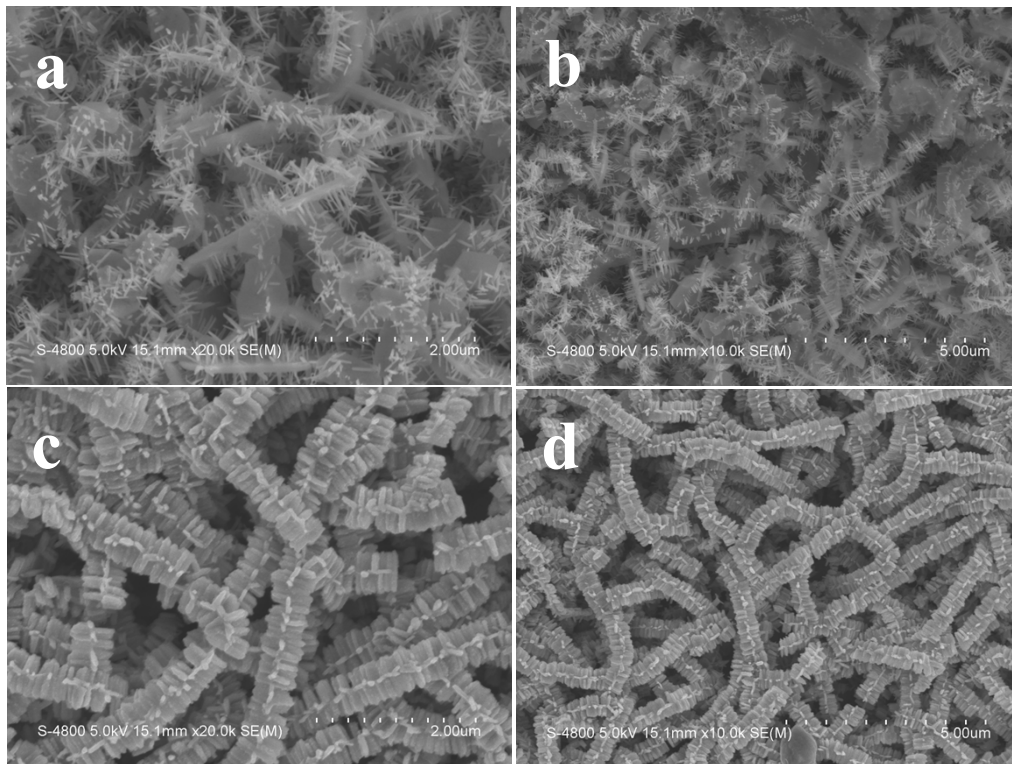

**Figure S2** Typical SEM images of products obtained at different reaction temperature (a and b) 40°C; (c and d) 100°C.

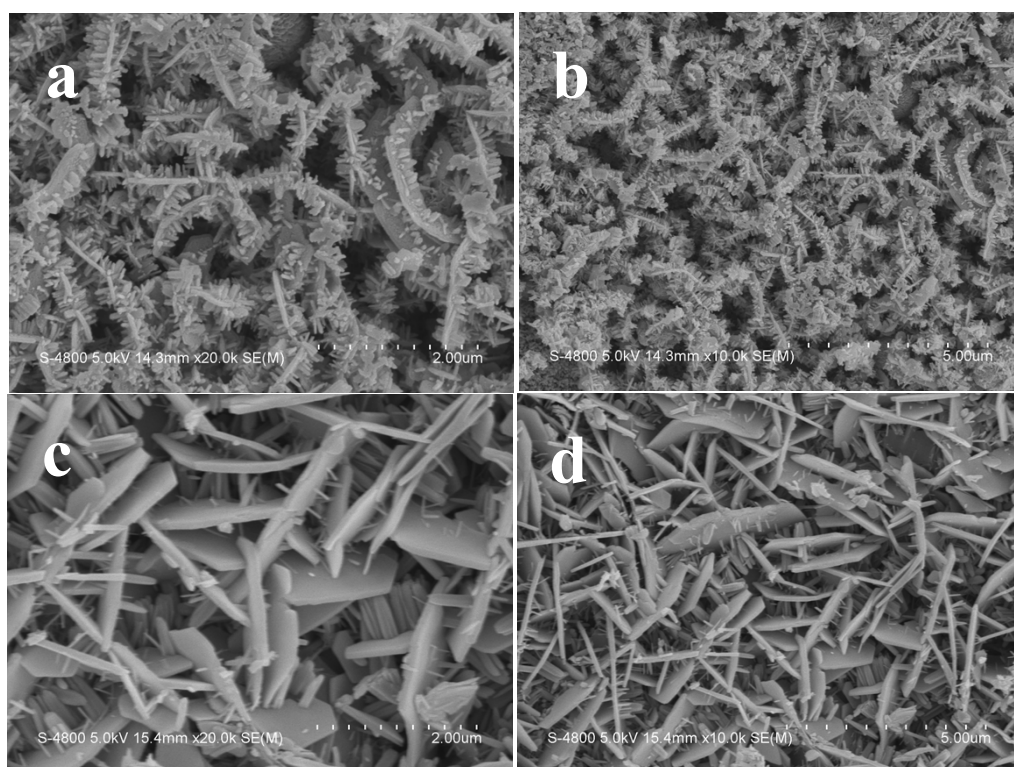

**Figure S3** Typical SEM images of products obtained at different concentrations of Ammonium hydroxide.(a and b) 0.2 mol L<sup>-1</sup>;(c and d) 0.6 mol L<sup>-1</sup>.

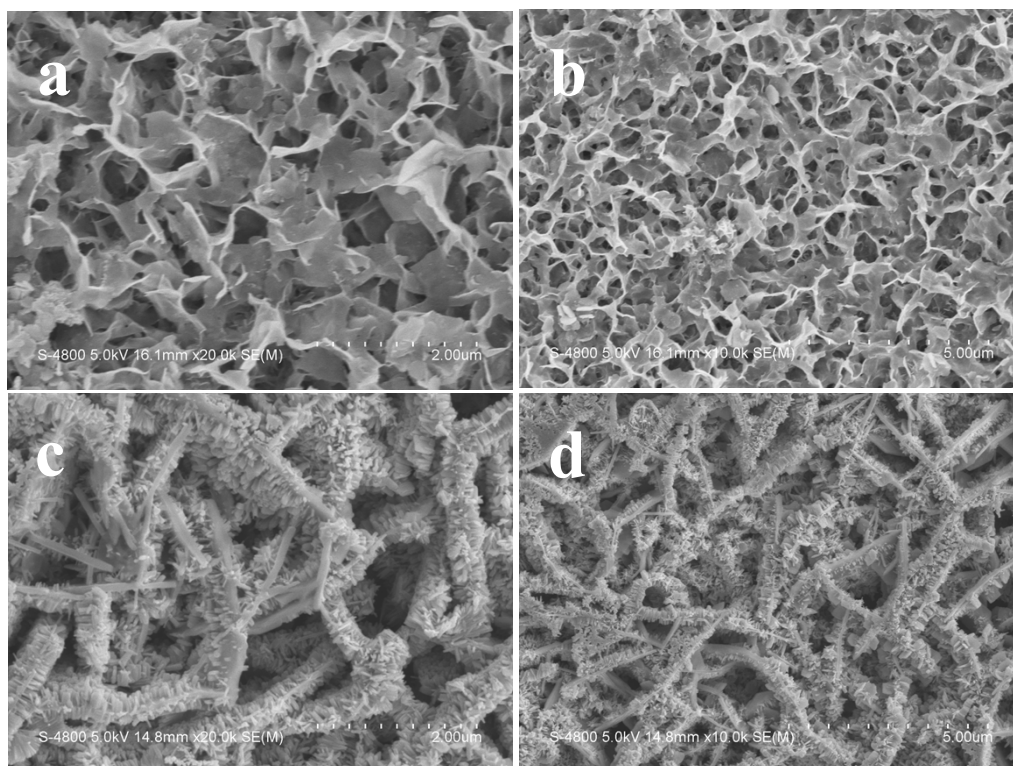

**Figure S4** Typical SEM images of products obtained at different concentrations of Thiourea.(a and b)0 mol L<sup>-1</sup>;(c and d)0.2 mol L<sup>-1</sup>.

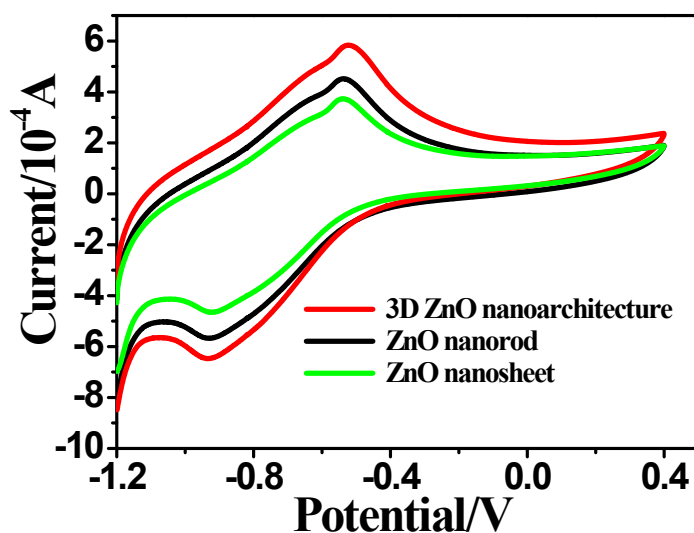

**Figure S5** Cyclic voltammograms of different morphology ZnO nanomaterial in 0.1 mol L<sup>-1</sup> NaOH with the same concentrations of HZ at a scanning rate of 50 mV s<sup>-1</sup>.

**Table S1** Comparison of performances of amperometric hydrazine sensors based on different modified electrode materials

| Electrode materials                    | Sensitivity/<br>$\mu\text{A mM}^{-1} \text{cm}^{-2}$ | Detection limit/<br>$\mu\text{mol L}^{-1}$ | Linear range/<br>$\mu\text{mol L}^{-1}$ | Reference |
|----------------------------------------|------------------------------------------------------|--------------------------------------------|-----------------------------------------|-----------|
| 3D ZnO nanoarchitecture                | 860.2                                                | 0.1                                        | 0.1-3200                                | This work |
| ZnO nanonails                          | 856                                                  | 1                                          | 0.1–1.2                                 | S1        |
| ZnO nanorods                           | 476                                                  | 2.2                                        | 0.2–2.0                                 | S2        |
| Carbon nanotubes powder microelectrode | 99.4                                                 | -                                          | -                                       | S3        |
| o-aminophenol grafted GCE              | 16                                                   | 0.5                                        | 2.0–20.0                                | S4        |
| Ni(II)/BA/MWCNT/PE                     | 66.9                                                 | 0.8                                        | 2.5-200                                 | S5        |

**Table S2** Comparison of other materials based on the onset oxidation potential ( $E_{\text{on}}$ ).

| Materials           | Onset potential/V | Reference |
|---------------------|-------------------|-----------|
| NiCo                | -0.21             | S6        |
| aminopolyacrylamide | -0.127            | S7        |
| Ni/C                | -0.0045           | S8        |
| Ni La/C             | -0.0185           | S8        |
| Fe                  | 0.654             | S9        |
| Pt                  | 0.062             | S9        |
| 3D ZnO              | -0.80             | This work |

**Reference:**

- (S1) A. Umar , M. M. Rahman, S. H. Kim and Y. B. Hahn, *Chemical Communications*, 2008, **16**,166-168.
- (S2) A. Umar, S. H. Kim, J. H. Kim, Y. B. Hahn, A. Umar, S. H. Kim, J. H. Kim, and Y. B.Hahn, *J. Nanosci. Nanotechnol.*, 2007, **7** ,162-165.
- (S3) Y. D. Zhao, W. D. Zhao, H. Chen and Q. M. Luo, *Talanta*, 2002, **58**.102-105.
- (S4) H. M. Nassef, A. E. Radi and C. K. O'Sullivan, *J. Electroanal. Chem.*, 2006, **12**,592-596.
- (S5) L. Ni, *Talanta*, 2009, **79**, 319–326.
- (S6) U. Martinez, K. Martinez, B. Halevi, A. Falase, B. Kiefer, A. Serov, M. Padilla, T. Olson, A. Datye, H. Tanaka, P. Atanassov, *Phys. Chem.Chem. Phys.* 2012,**14**,5512-5517.
- (S7) K. Asazawa, K. Yamada, H. Tanaka, M. Taniguchi, K. Oguro, *J. Power Sources*, 2009, **191**, 362-365.
- (S8) T. Sakamoto, K. Asazawa, U. Martinez, B. Halevi, T. Suzuki. S. Arai, D. Matsumura, Y. Nishihata, P. Atanassov, Tanaka, H. *J. Power Sources*, 2013, **234**, 252-259.
- (S9) A. Serov, C. Kwak , *Appl. Catal. B: Environ.* 2010, **98**, 1-9.
